# Supplementary material
Source: PubMed Central journal article supplement (PMC3041168)
Supplement: cc0916_3353SD1.pdf [file cc0916_3353SD1.pdf]

## Supplemental Information

Supplemental Figure 1

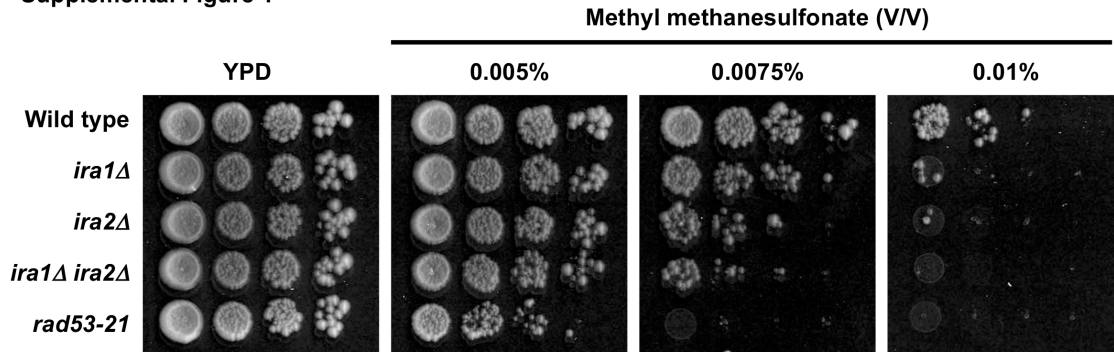

**Figure S1 – *IRA* deletion strains are sensitive to chronic methyl methanesulfonate exposure.** Serial dilutions of log phase cultures were dropped onto YPD agar containing methyl methanesulfonate and incubated for three days at 30° before photographing.

Supplemental Figure 2

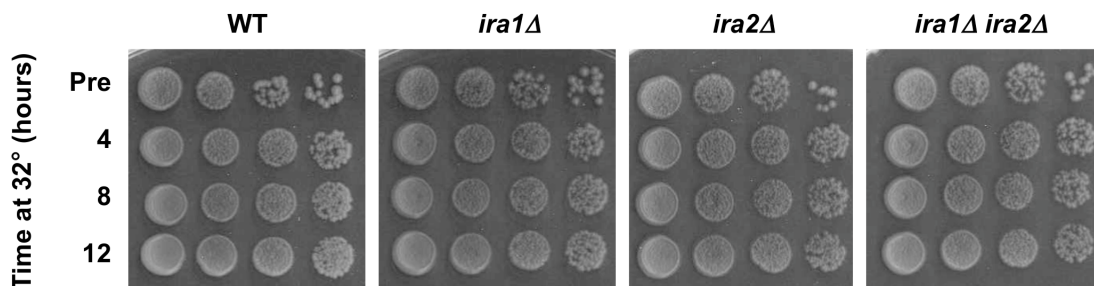

**Figure S2 – *IRA* deletion strains tolerate high temperature incubation.** Strains with *IRA* deletion and wild-type *CDC13* were incubated at 32°. At the indicated times, a sample was extracted, serially diluted, and dropped onto 30° YPD agar. Plates were incubated for three days before photographing.

### Supplemental Figure 3

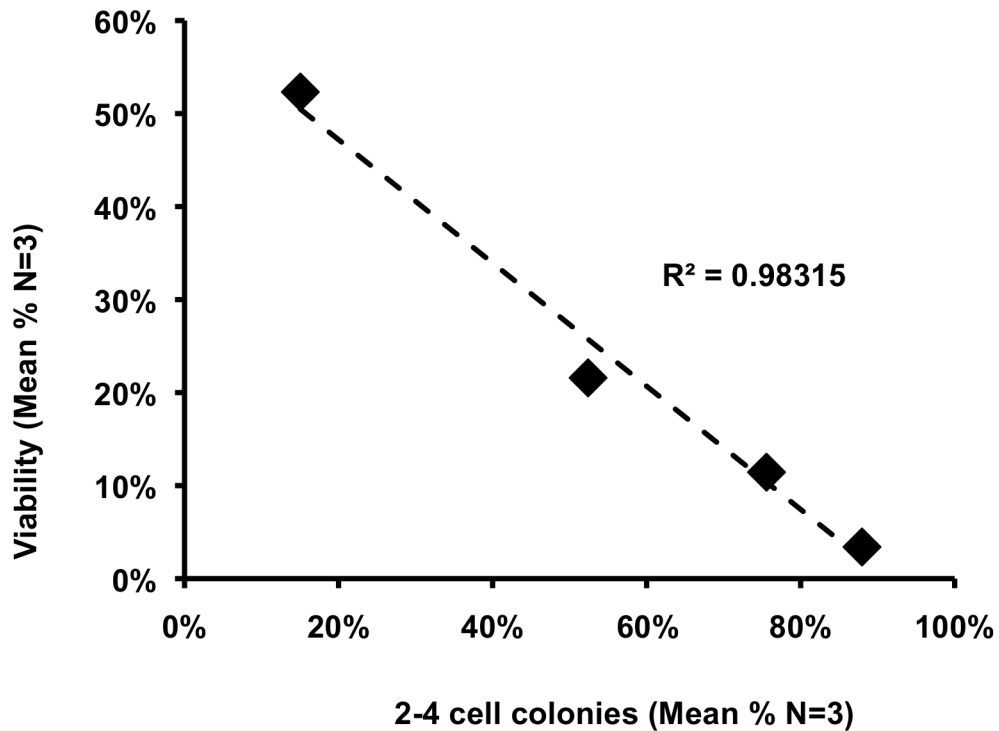

**Figure S3 – Viability loss is tightly correlated with the appearance of 2-4 cell colonies in *cdc13-1* recovery.** Data from Figure 1D for *cdc13-1 ira1Δ ira2Δ* was plotted with viability and colony morphology on the axes. Each data point represents a different duration of *cdc13-1* inactivation. The  $R^2$  value was calculated by fitting a linear trendline in Microsoft Excel.

Supplemental Figure 4

A

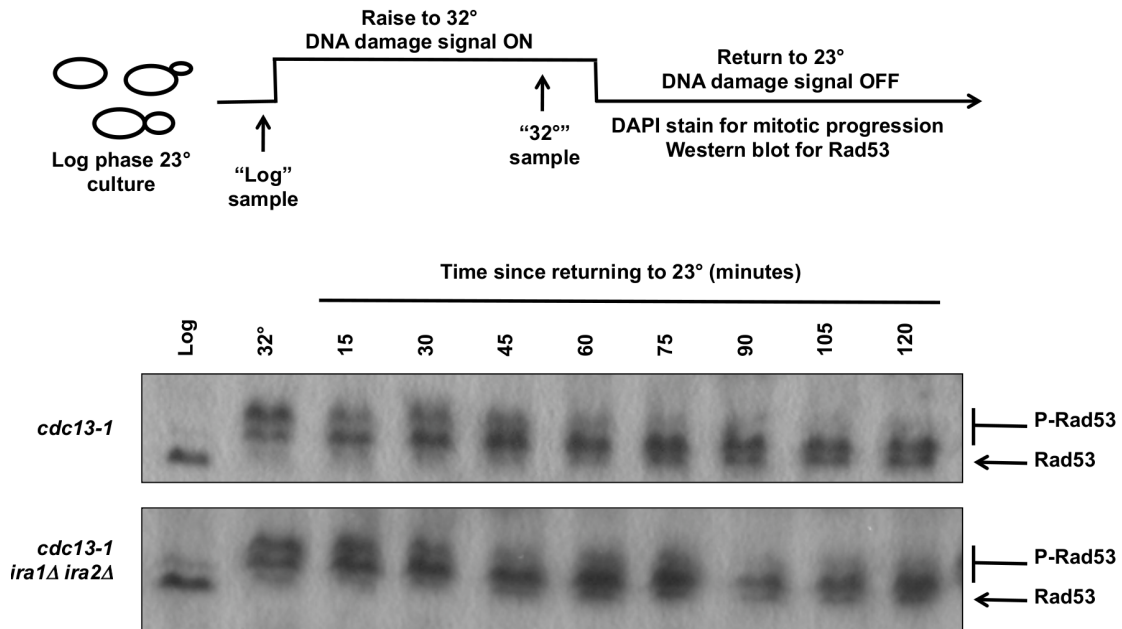

B

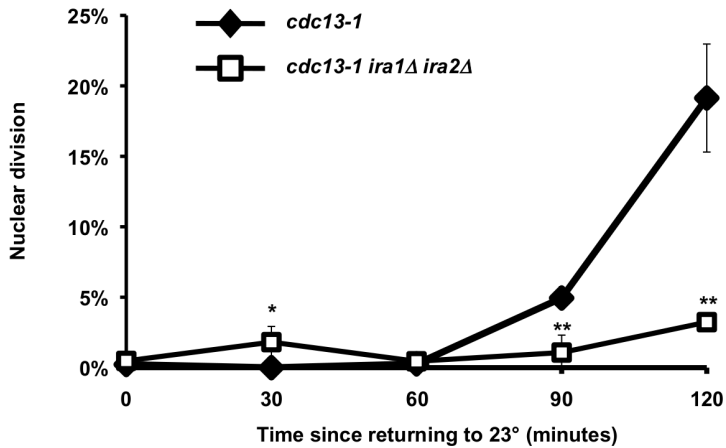

**Figure S4 – *IRA* deletion impairs checkpoint recovery despite checkpoint inactivation.** Log phase cultures were raised to 32° for four hours, then returned to 21° to allow checkpoint recovery. Protein samples were analyzed for Rad53

phosphorylation in (A), and fixed samples were scored for nuclear division in (B).

Values in (B) are mean  $\pm$  standard deviation of three assays.
